# Supplementary material for: A pyrylium–coumarin dyad as a colorimetric receptor for ratiometric detection of cyanide anions by two absorption bands in the visible region
Source: Royal Society of Chemistry journal article supplement (doi:10.1039/c5nj02219c), 2015-10-23
Supplement: c5nj02219c1.pdf [file c5nj02219c1.pdf]

## Pyrylium–coumarin dyad as a colorimetric receptor for ratiometric detection of cyanide anion by two absorption bands in visible region

Yasuhiro Shiraishi,<sup>a,b\*</sup> Masaya Nakamura,<sup>a</sup> Naoyuki Matsushita<sup>a</sup> and Takayuki Hirai<sup>a</sup>

<sup>a</sup> Research Center for Solar Energy Chemistry, and Division of Chemical Engineering, Graduate School of Engineering Science, Osaka University, Toyonaka 560-8531, Japan

<sup>b</sup> PRESTO, JST, Saitama 332-0012, Japan.

shiraish@cheng.es.osaka-u.ac.jp

### ELECTRONIC SUPPLEMENTARY INFORMATION (ESI†)

#### CONTENTS

|                                                                                                                | Page |
|----------------------------------------------------------------------------------------------------------------|------|
| <b>Table S1</b> TD-DFT calculation results for <b>1</b> and <b>1</b> –CN <sup>−</sup> .....                    | 2    |
| <b>Fig. S1</b> <sup>1</sup> H NMR chart of <b>2</b> .....                                                      | 3    |
| <b>Fig. S2</b> <sup>1</sup> H NMR chart of <b>1</b> .....                                                      | 4    |
| <b>Fig. S3</b> <sup>13</sup> C NMR chart of <b>1</b> .....                                                     | 5    |
| <b>Fig. S4</b> FAB-MS chart of <b>1</b> .....                                                                  | 6    |
| <b>Fig. S5</b> FAB-MS chart of the product obtained by the reaction of <b>1</b> with CN <sup>−</sup> .....     | 7    |
| <b>Fig. S6</b> Absorption titration of <b>3</b> with CN <sup>−</sup> .....                                     | 8    |
| <b>Fig. S7</b> FAB-MS chart of the product obtained by the reaction of <b>3</b> with CN <sup>−</sup> .....     | 9    |
| <b>Fig. S8</b> <sup>1</sup> H- <sup>1</sup> H COSY chart of the product for <b>3</b> and CN <sup>−</sup> ..... | 10   |
| <b>Fig. S9</b> IR spectra for <b>3</b> and <b>3</b> –CN <sup>−</sup> .....                                     | 11   |
| <b>Fig. S10</b> Fluorescence spectra of <b>1</b> and <b>1</b> with CN <sup>−</sup> .....                       | 12   |
| <b>Cartesian coordinates for respective compounds</b> .....                                                    | 13   |

**Table S1** Calculated excitation energy ( $E$ ), wavelength ( $\lambda$ ), and oscillator strength ( $f$ ) for low-lying singlet state ( $S_n$ ) of **1** and **1-CN<sup>-</sup>**.

| compound                             | Main orbital transition (CIC <sup>a</sup> ) | $E$ (eV) [ $\lambda$ (nm)]           | $f$                                 |                 |        |
|--------------------------------------|---------------------------------------------|--------------------------------------|-------------------------------------|-----------------|--------|
| <b>1</b>                             | $S_0 \rightarrow S_1$                       | HOMO $\rightarrow$ LUMO (0.63574)    | 2.1389 [517.65]                     | 1.6574          |        |
|                                      | $S_0 \rightarrow S_2$                       | HOMO-1 $\rightarrow$ LUMO (0.67037)  | 2.9968 [413.72]                     | 0.3438          |        |
|                                      | $S_0 \rightarrow S_3$                       | HOMO-3 $\rightarrow$ LUMO (0.18301)  | 3.1441 [394.34]                     | 0.2277          |        |
|                                      |                                             | HOMO-2 $\rightarrow$ LUMO (0.57594)  |                                     |                 |        |
|                                      | $S_0 \rightarrow S_4$                       | HOMO $\rightarrow$ LUMO+1 (-0.34251) | 3.2941 [376.39]                     | 0.2496          |        |
|                                      |                                             | HOMO-3 $\rightarrow$ LUMO (0.58965)  |                                     |                 |        |
|                                      | <b>1-CN<sup>-</sup></b>                     | $S_0 \rightarrow S_1$                | HOMO $\rightarrow$ LUMO (0.65670)   | 2.1460 [577.75] | 0.6537 |
|                                      |                                             | $S_0 \rightarrow S_2$                | HOMO-7 $\rightarrow$ LUMO (0.24260) | 2.8659 [432.62] | 0.1001 |
| HOMO-6 $\rightarrow$ LUMO (-0.12127) |                                             |                                      |                                     |                 |        |
| HOMO-4 $\rightarrow$ LUMO (0.22493)  |                                             |                                      |                                     |                 |        |
| HOMO-3 $\rightarrow$ LUMO (-0.17634) |                                             |                                      |                                     |                 |        |
| HOMO-2 $\rightarrow$ LUMO (0.48357)  |                                             |                                      |                                     |                 |        |
| $S_0 \rightarrow S_3$                |                                             | HOMO-1 $\rightarrow$ LUMO (0.23696)  | 3.0772 [402.92]                     | 0.3863          |        |
|                                      |                                             | HOMO-7 $\rightarrow$ LUMO (-0.15776) |                                     |                 |        |
|                                      |                                             | HOMO-2 $\rightarrow$ LUMO (-0.15381) |                                     |                 |        |
| $S_0 \rightarrow S_4$                |                                             | HOMO-1 $\rightarrow$ LUMO (0.54466)  | 3.1392 [394.95]                     | 0.8202          |        |
|                                      |                                             | HOMO $\rightarrow$ LUMO+1 (-0.30720) |                                     |                 |        |
|                                      |                                             | HOMO-7 $\rightarrow$ LUMO (-0.11002) |                                     |                 |        |
|                                      | HOMO-4 $\rightarrow$ LUMO (-0.11068)        |                                      |                                     |                 |        |
|                                      | HOMO-1 $\rightarrow$ LUMO (0.25740)         |                                      |                                     |                 |        |
|                                      | HOMO $\rightarrow$ LUMO+1 (0.56501)         |                                      |                                     |                 |        |

<sup>a</sup> CI expansion coefficients for the main orbital transitions.

DFILE pylirium\_Proton-1-1.als  
 COMNT single\_pulse  
 DATIM 2014-05-29 15:53:28  
 OBNUC 1H  
 EXMOD proton\_jxp  
 OBFRQ 399.78 MHz  
 OBSET 4.19 KHz  
 OBFIN 7.29 Hz  
 POINT 13107  
 FREQU 5002.40 Hz  
 SCANS 8  
 ACQTM 2.1837 sec  
 PD 15.0000 sec  
 PW1 5.00 usec  
 IRNUC 1H  
 CTEMP 30.0 C  
 SLVNT DMSO  
 EXREF 0.00 ppm  
 BF 0.10 Hz  
 RGAIN 46

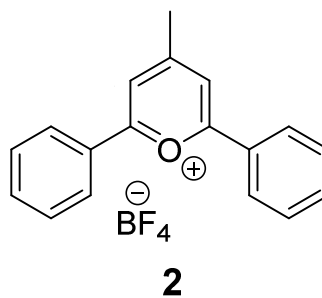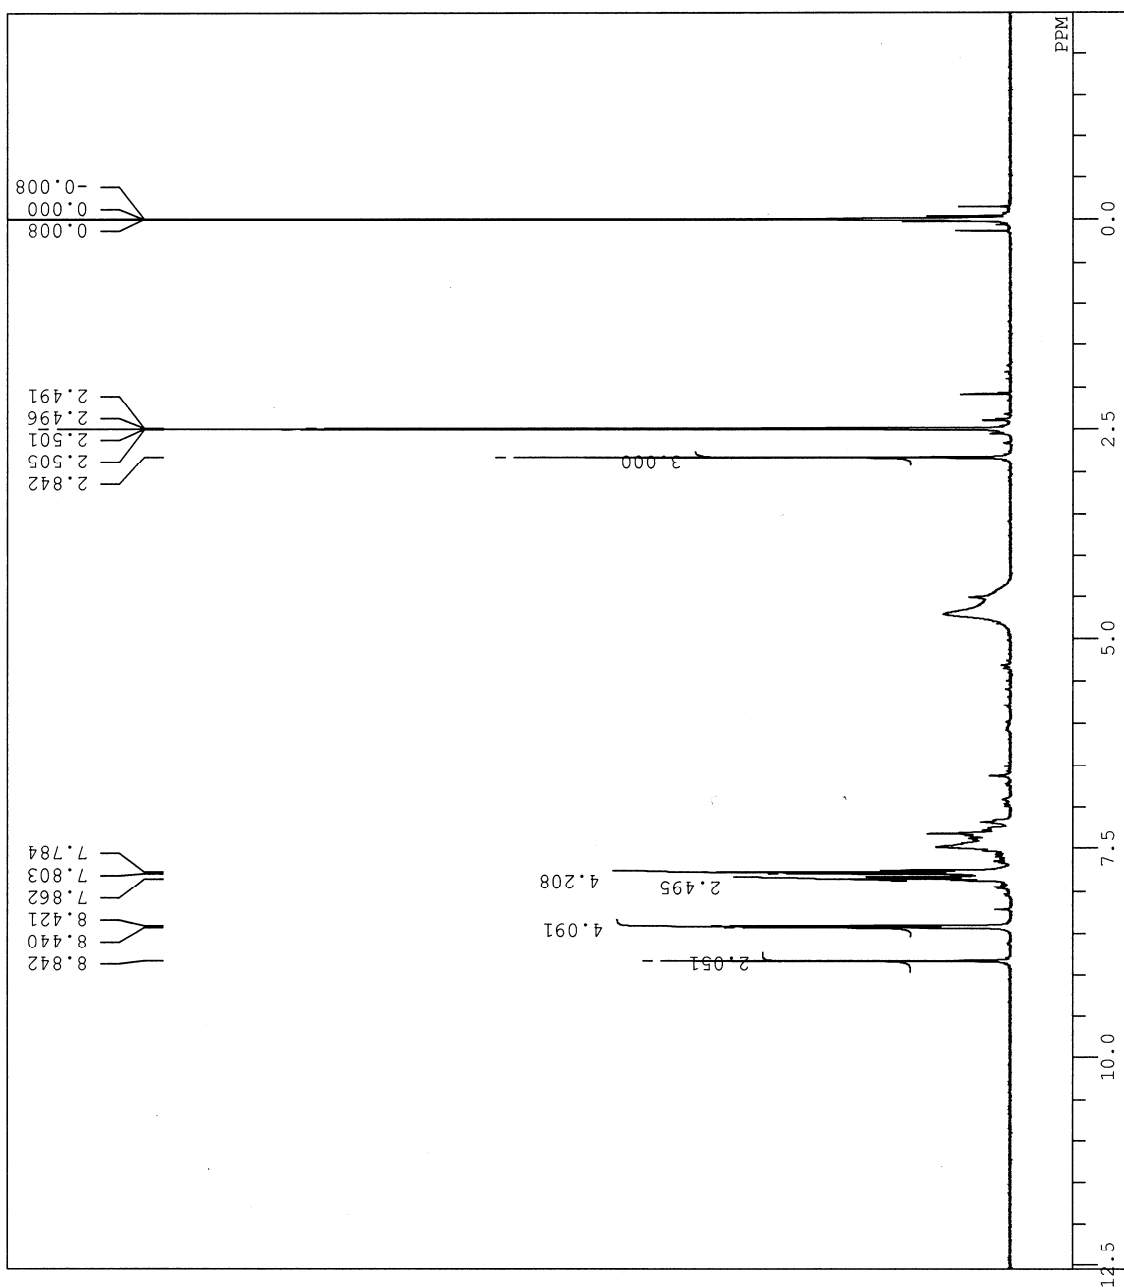

Fig. S1 <sup>1</sup>H NMR chart of 2 (DMSO-d<sub>6</sub>, 400 MHz).

DFILE CouPY\_Proton(2)-1-1.als  
 COMNT single\_pulse  
 DATIM 2015-03-02 20:34:59  
 OBNUC 1H  
 EXMOD proton.jxp  
 OBFRQ 399.78 MHz  
 OBSET 4.19 KHz  
 OBFIN 7.29 Hz  
 POINT 16384  
 FREQU 7503.00 Hz  
 SCANS 16  
 ACQTM 2.1837 sec  
 PD 15.0000 sec  
 PW1 5.00 usec  
 IRNUC 1H  
 CTEMP 30.0 c  
 SLVNT DMSO  
 EXREF 0.00 ppm  
 BF 0.10 Hz  
 RGAIN 42

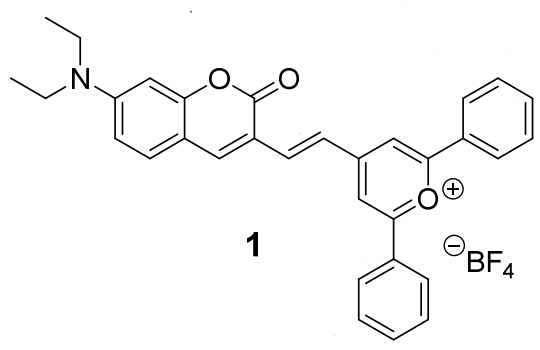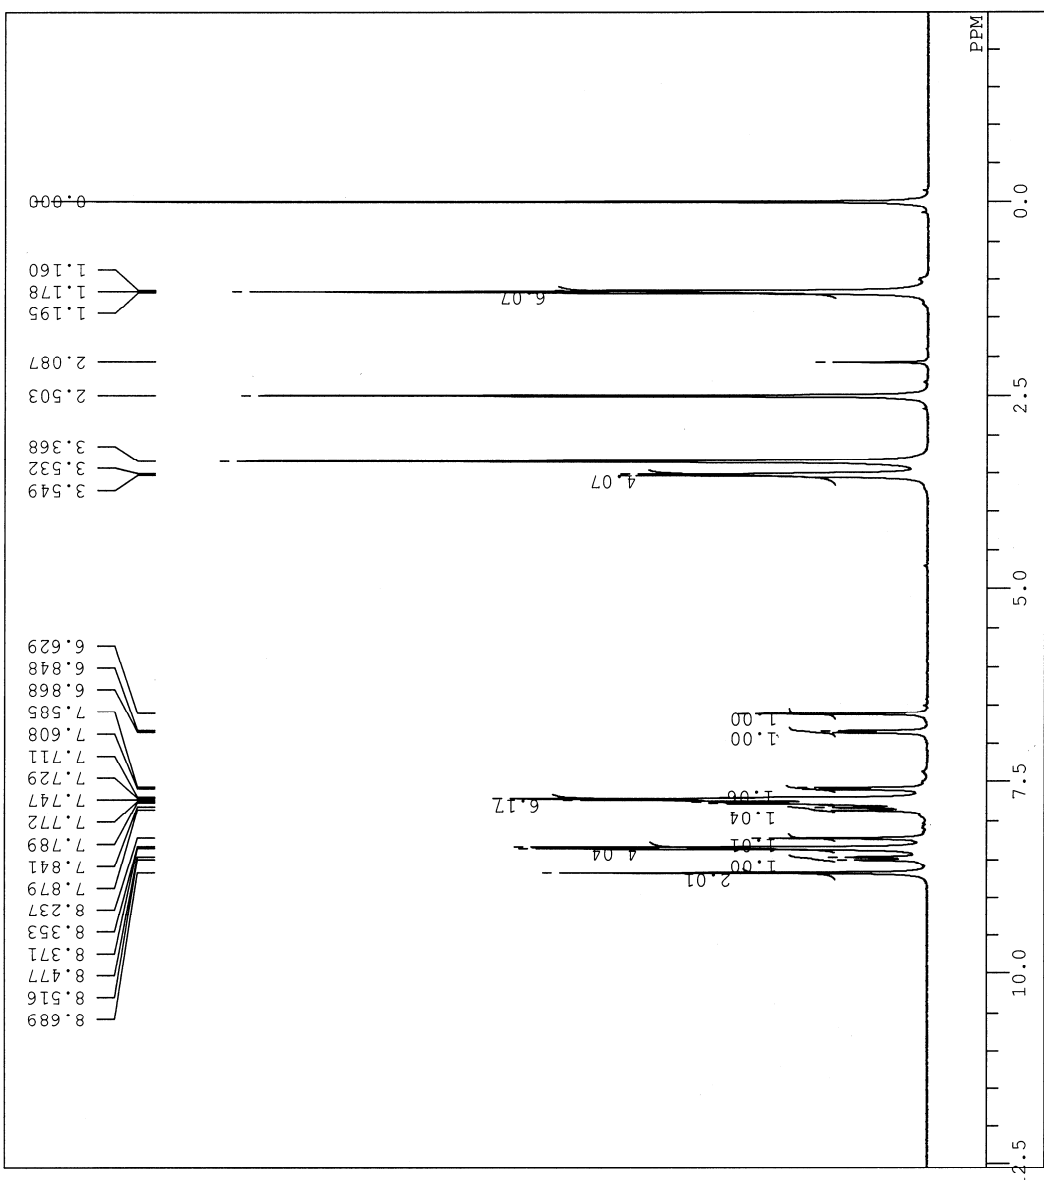

Fig. S2 <sup>1</sup>H NMR chart of **1** (DMSO-*d*<sub>6</sub>, 400 MHz).

DFILE CouPY\_Carbon-1-1.als  
 COMNT single\_pulse decoupled g  
 DATIM 2015-03-04 23:41:34  
 OBNUC 13C  
 EXMOD carbon.jxo

OBFRQ 100.53 MHz  
 OBSET 5.35 KHz  
 OBFIN 5.86 Hz  
 POINT 26214  
 FREQU 25125.63 Hz  
 SCANS 8192  
 ACQTM 1.0433 sec  
 PD 2.0000 sec  
 PW1 2.87 usec  
 IRNUC 1H  
 CTEMP 30.0 c  
 SLVNT DMSO  
 EXREF 0.00 ppm  
 BF 0.10 Hz  
 RGAIN 50

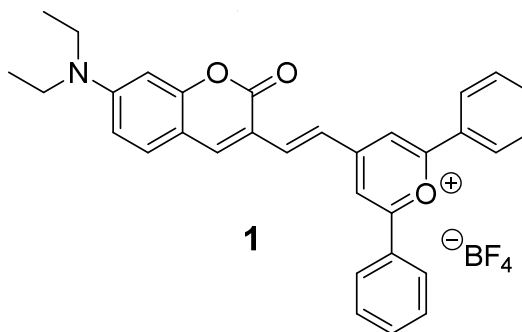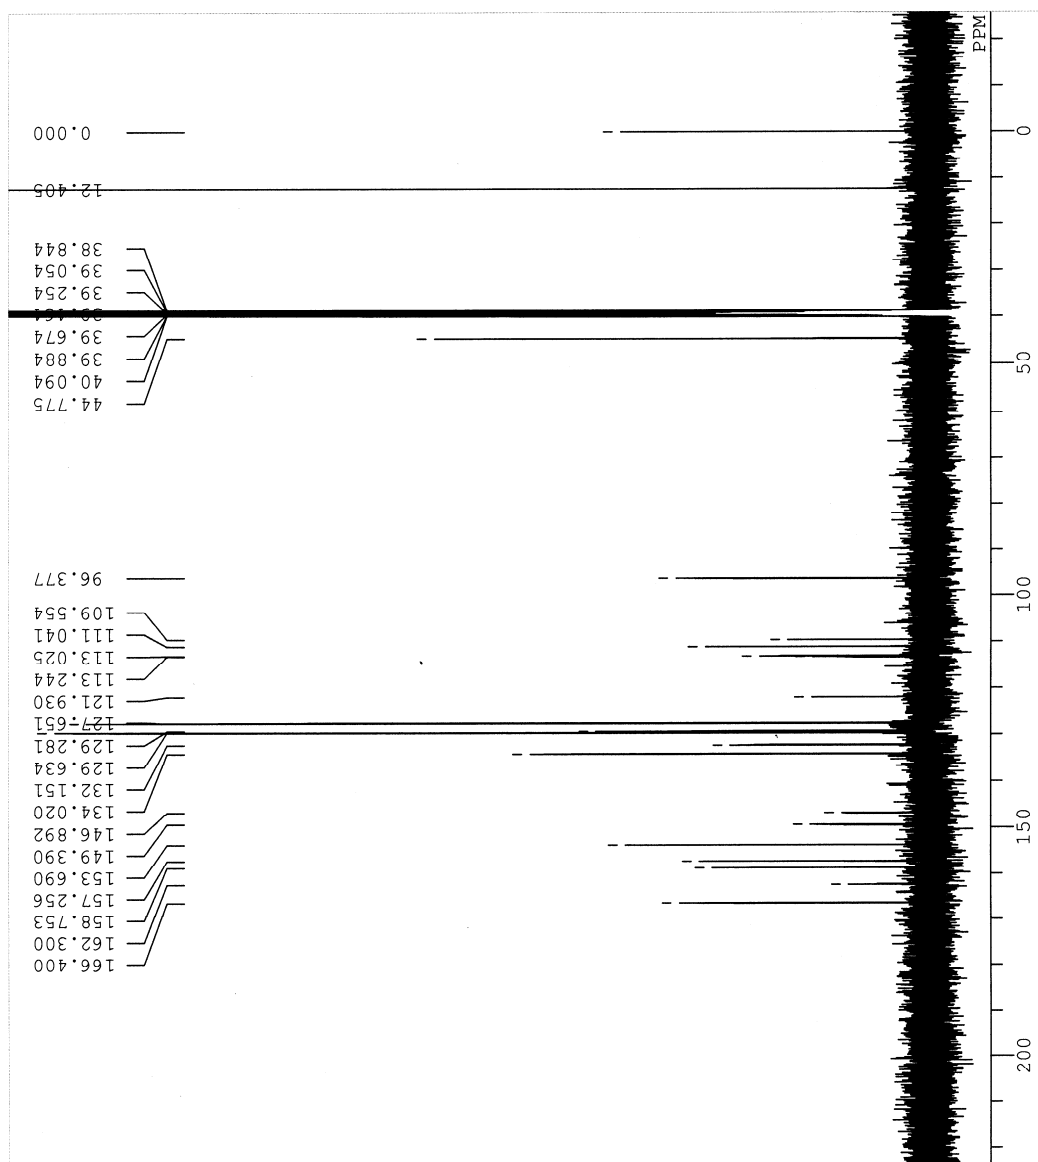

**Fig. S3**  $^{13}\text{C}$  NMR chart of **1** (DMSO- $d_6$ , 100 MHz).

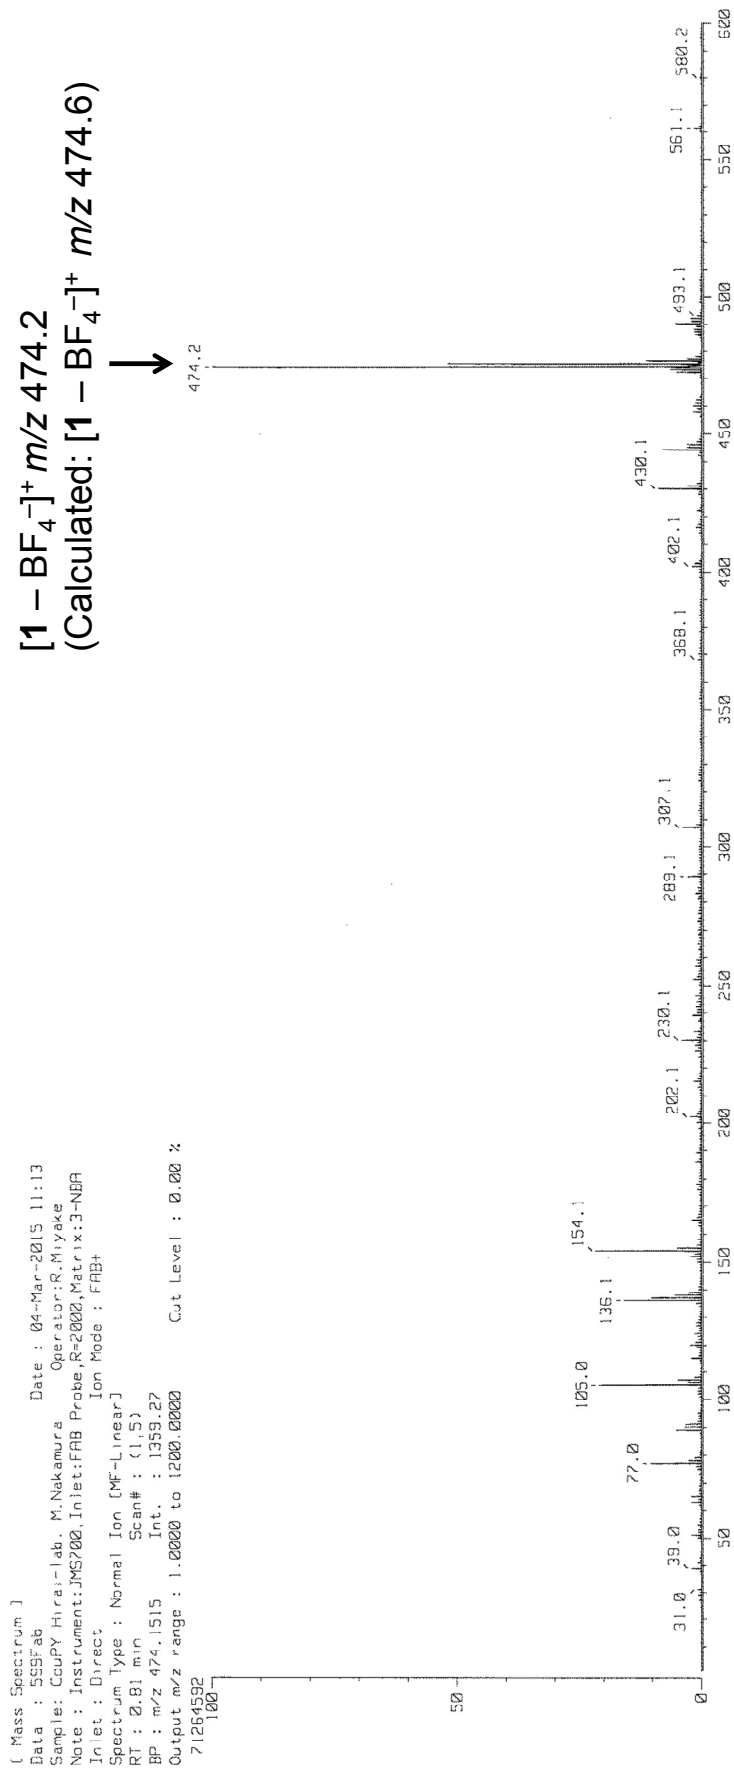

Fig. S4 FAB-MS chart of 1.

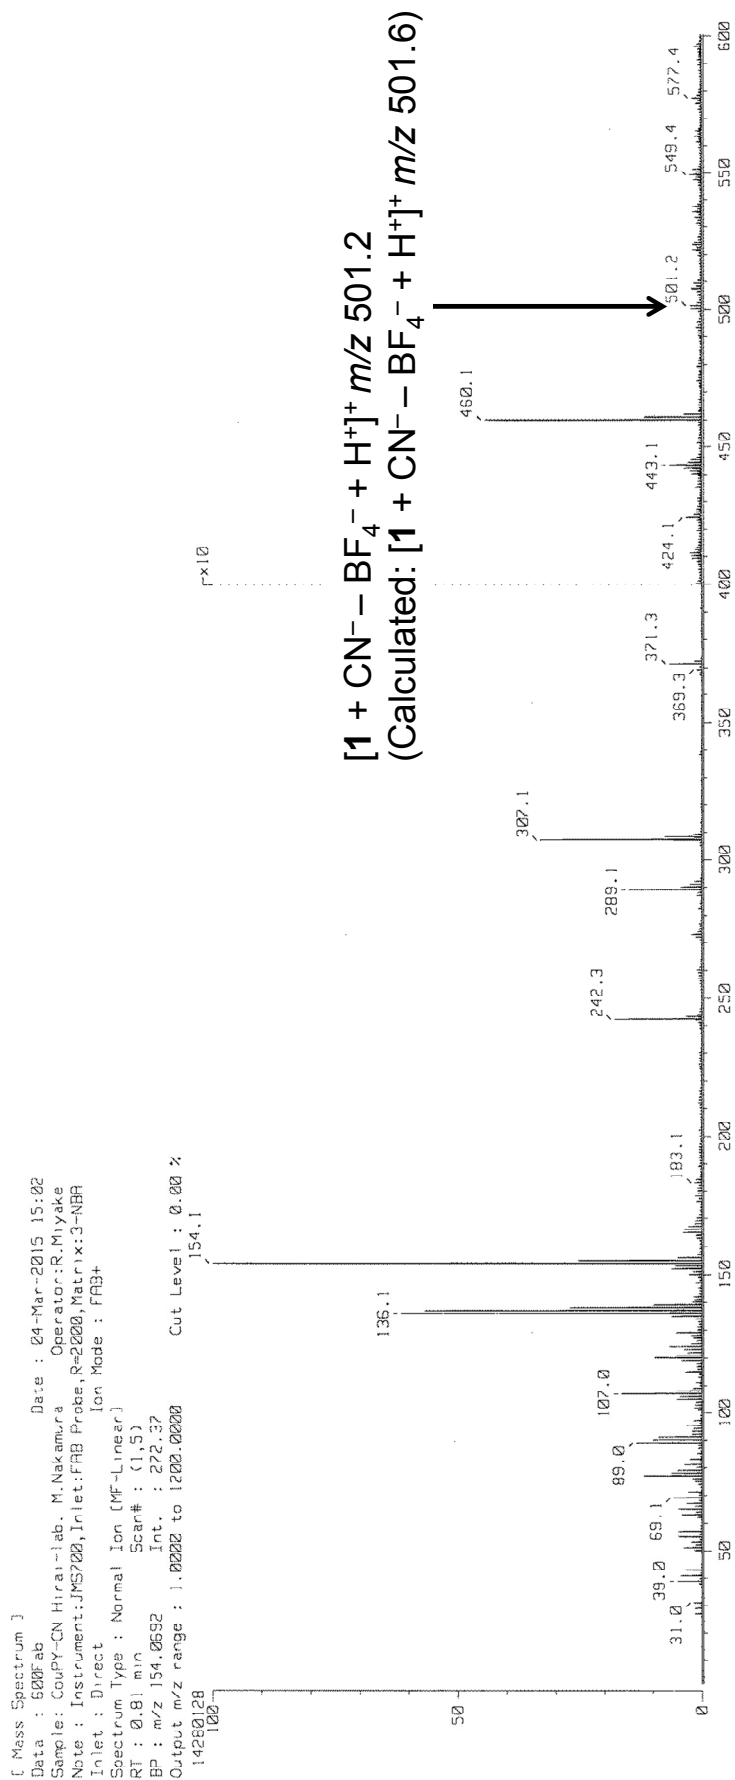

Fig. S5 FAB-MS chart for the product obtained by the reaction of **1** with  $\text{CN}^-$ .

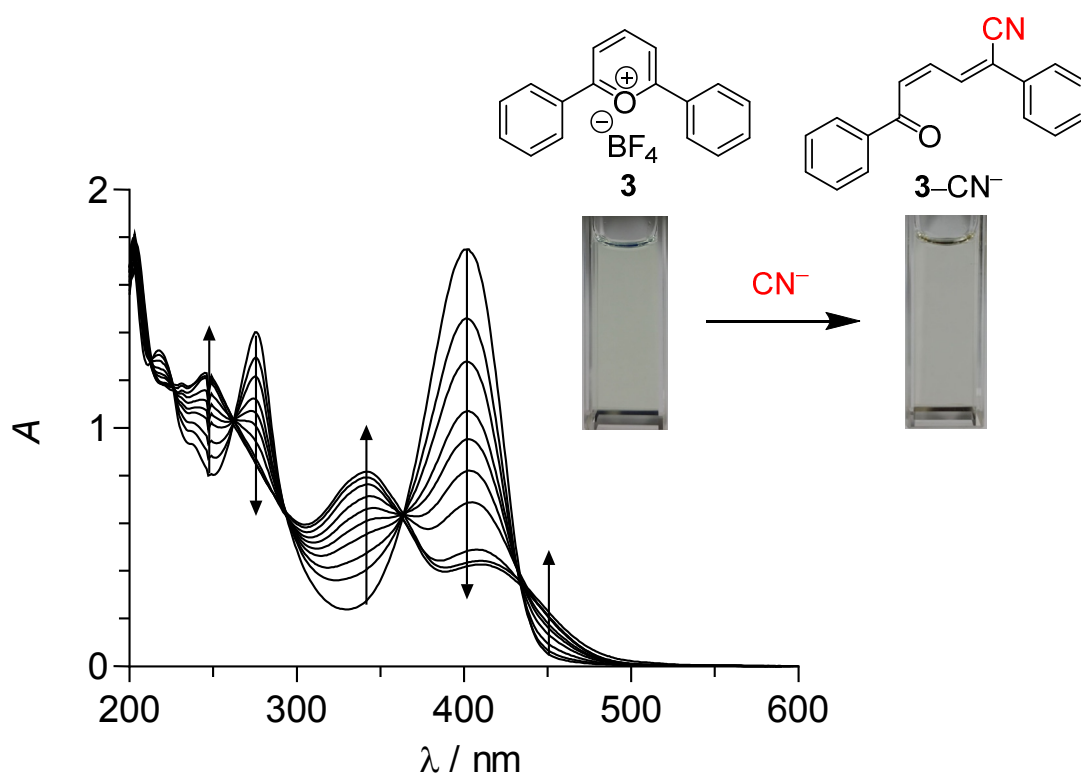

**Fig S6** Result of absorption titration of **3** (100  $\mu\text{M}$ ) with 0–1 equiv of  $\text{CN}^-$  in MeCN at 25  $^\circ\text{C}$ .



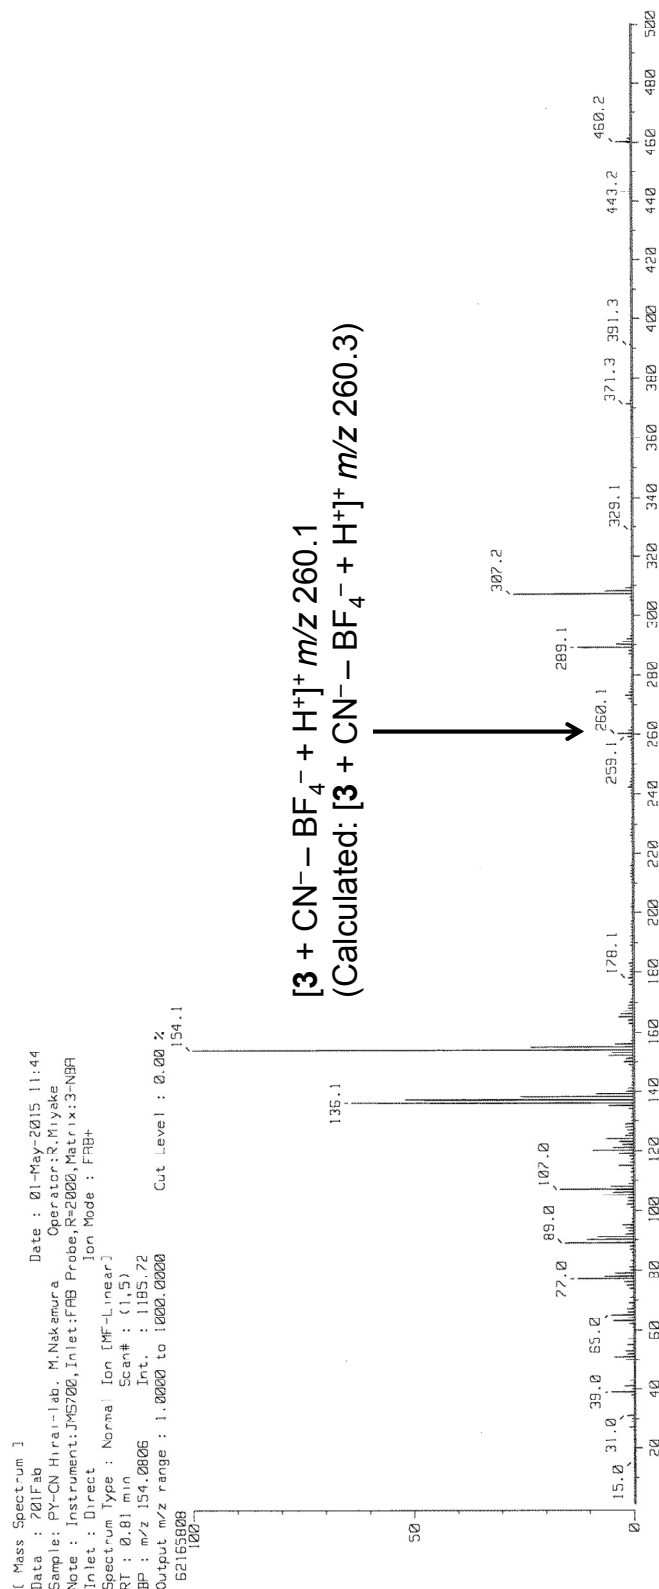

**Fig S7** FAB-MS chart of the product obtained by the reaction of **3** with CN<sup>-</sup>. An MeCN solution containing **3** and 1 equiv of CN<sup>-</sup> was stirred for 5 min at 298 K. The resultant was concentrated by evaporation and purified by silica gel column chromatography with a mixture of toluene/CH<sub>2</sub>Cl<sub>2</sub>/*n*-hexane (1/1/3 v/v/v, 600 mL), (3/2/3 v/v/v, 600 mL), and then (0/1/0 v/v/v, 600 mL) as an eluent. The concentration of the final eluent was subjected to analysis.

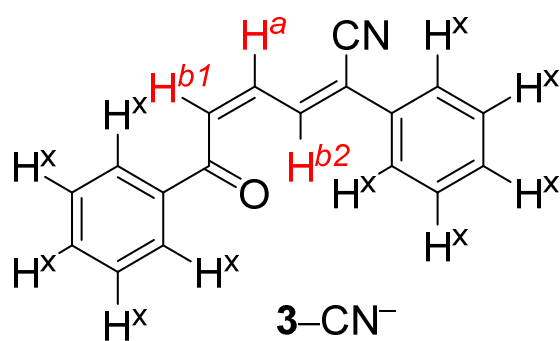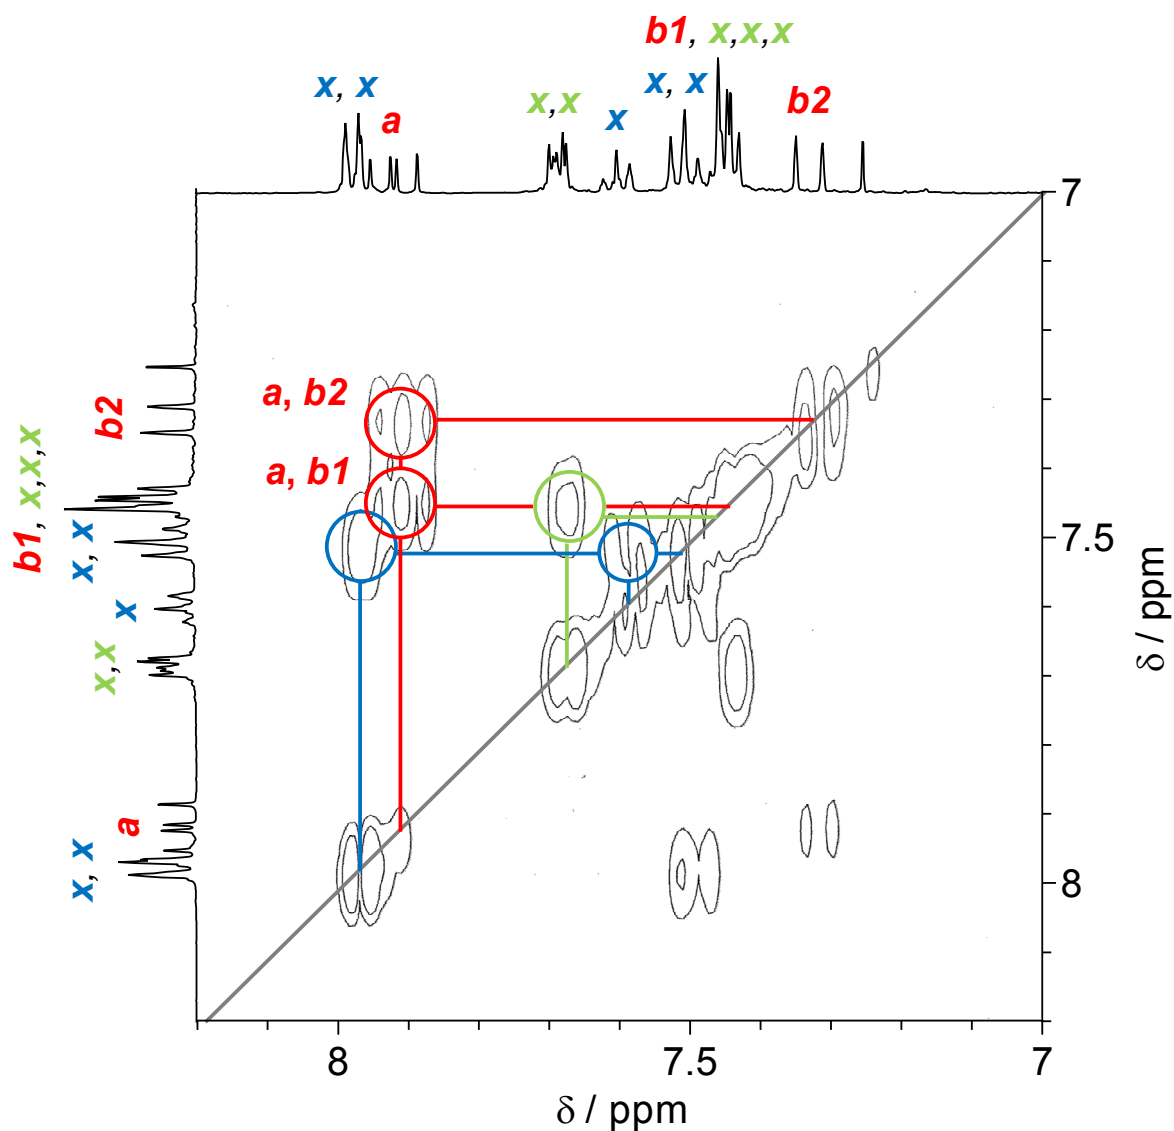

**Fig S8** <sup>1</sup>H-<sup>1</sup>H COSY chart of the product obtained by the reaction of **3** with CN<sup>-</sup> (CDCl<sub>3</sub>, 400 MHz). Red, blue, and yellow green circles indicate the observed cross peaks of olefinic protons, phenyl group, and another phenyl group, respectively. The texts next to the circle mean the coupling protons.

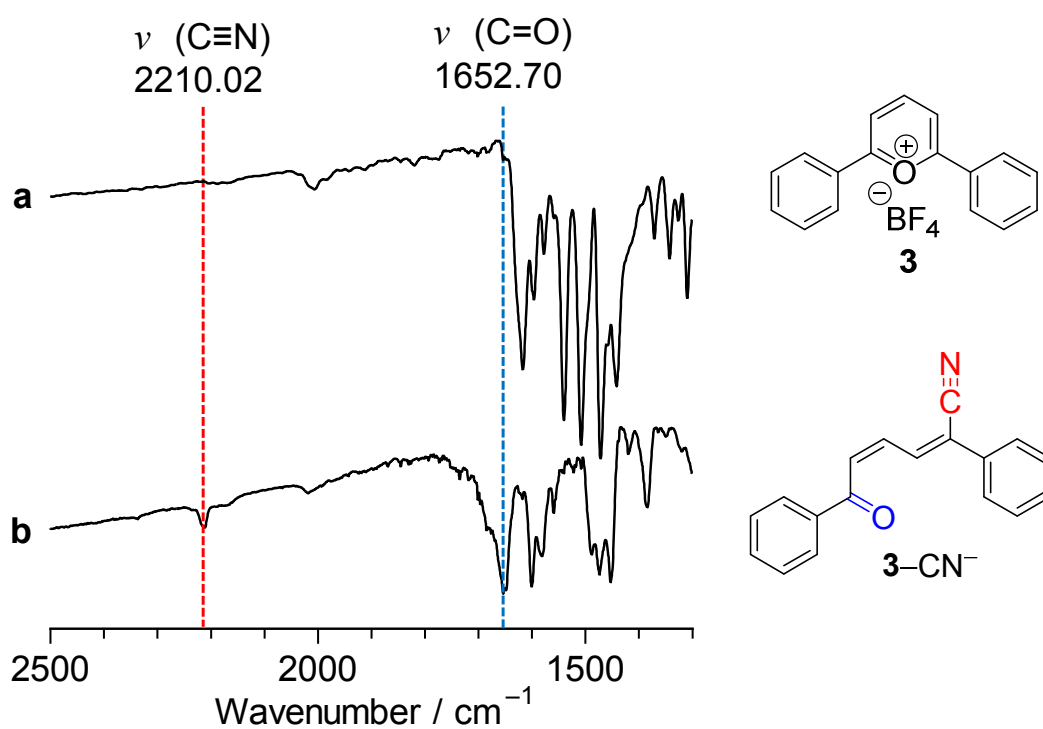

**Fig. S9** IR chart of (a) **3** and (b) **3-CN<sup>-</sup>** measured on KBr disk.

The sample (b) was measured as follows: an MeCN solution containing **3** and 1 equiv of  $\text{CN}^-$  was stirred for 5 min at 298 K. The resultant was concentrated by evaporation and subjected to IR analysis.

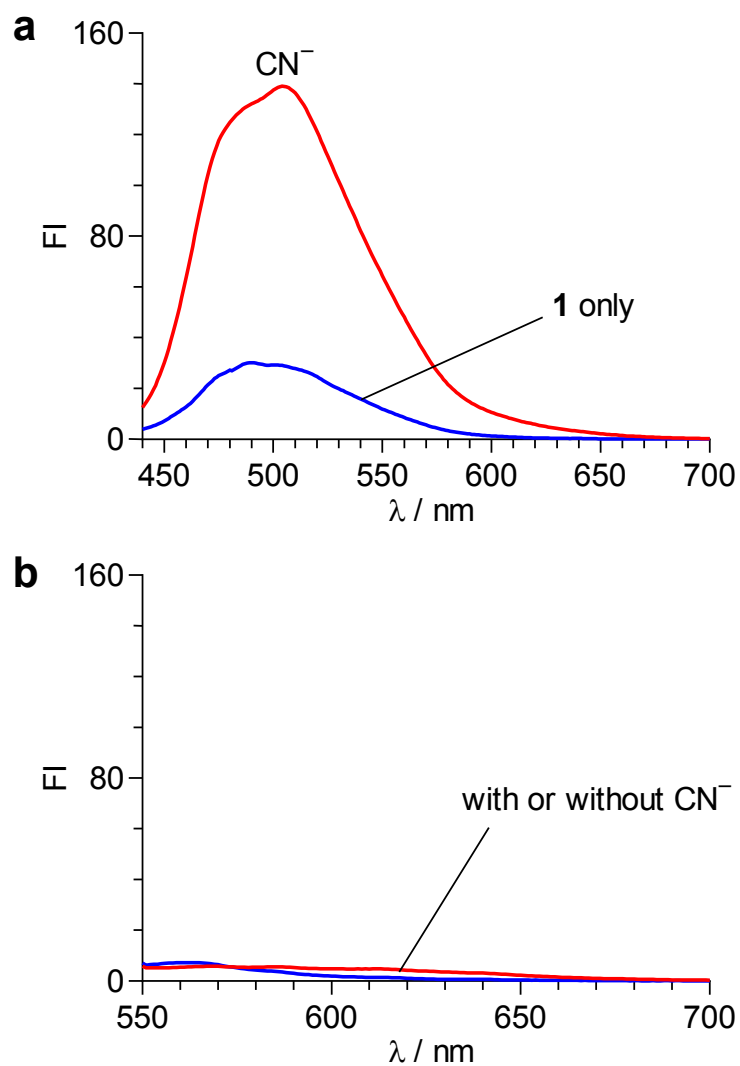

**Fig. S10** Fluorescence spectra of **1** (10  $\mu\text{M}$ ) measured at (a)  $\lambda_{\text{ex}} = 427$  nm and (b)  $\lambda_{\text{ex}} = 540$  nm without or with 50 equiv of  $\text{CN}^-$  in a buffered water/MeCN mixture (1/9 v/v; Tris-HCl 10 mM, pH 9.0) at 25  $^\circ\text{C}$ .

Cartesian Coordinates (in Å) of **1**

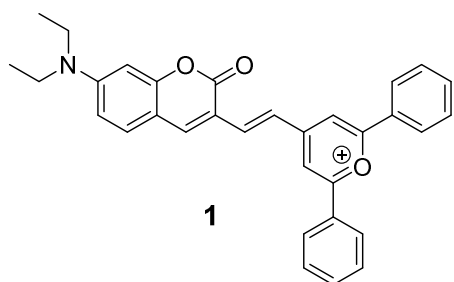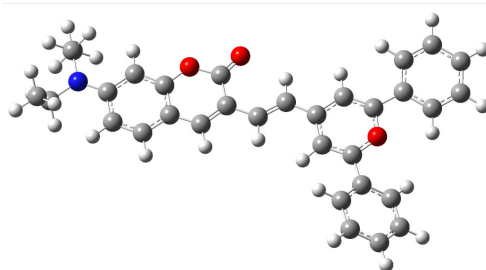

|   |           |           |           |   |            |           |           |
|---|-----------|-----------|-----------|---|------------|-----------|-----------|
| C | 3.194408  | -1.407424 | -0.076478 | C | -9.436433  | 1.59037   | -1.207551 |
| C | 4.540247  | -1.138617 | -0.06519  | C | -9.033509  | 1.00649   | 0.150581  |
| O | 4.960186  | 0.149896  | -0.022756 | C | -8.682856  | -2.110117 | 1.327469  |
| C | 4.092182  | 1.192791  | 0.009834  | C | -8.552344  | -1.427112 | -0.038403 |
| C | 2.740878  | 0.966022  | -0.000091 | H | 2.852775   | -2.438213 | -0.090429 |
| C | 2.234177  | -0.362592 | -0.047681 | H | 2.074266   | 1.81873   | 0.064688  |
| C | 4.76022   | 2.497204  | 0.064235  | H | 0.618083   | -1.772494 | -0.070419 |
| C | 5.635562  | -2.110925 | -0.096683 | H | 0.038096   | 1.250338  | -0.004169 |
| C | 0.845551  | -0.713667 | -0.048106 | H | 3.138608   | 3.564258  | -0.905329 |
| C | -0.19054  | 0.183186  | -0.023967 | H | 4.25182    | 5.760961  | -0.786367 |
| C | -1.598134 | -0.090892 | -0.022567 | H | 6.521389   | 5.965007  | 0.219616  |
| C | 4.119731  | 3.643213  | -0.441306 | H | 7.663875   | 3.943029  | 1.120085  |
| C | 4.752806  | 4.882431  | -0.383829 | H | 6.545737   | 1.744388  | 1.031014  |
| C | 6.02871   | 4.994943  | 0.176379  | H | 7.174464   | -0.667619 | 0.390805  |
| C | 6.672456  | 3.860014  | 0.678383  | H | 9.012944   | -2.307248 | 0.353472  |
| C | 6.047145  | 2.61697   | 0.620742  | H | 8.546727   | -4.700006 | -0.161844 |
| C | 6.95847   | -1.705791 | 0.165006  | H | 6.214171   | -5.428416 | -0.648739 |
| C | 7.996055  | -2.633902 | 0.143502  | H | 4.374867   | -3.803493 | -0.624877 |
| C | 7.733515  | -3.976148 | -0.144268 | H | -2.107407  | 1.990749  | 0.018514  |
| C | 6.424335  | -4.386437 | -0.414452 | H | -6.013127  | -1.890994 | 0.000333  |
| C | 5.381812  | -3.464782 | -0.393194 | H | -6.888152  | 2.388242  | 0.060533  |
| C | -2.128209 | -1.456513 | -0.043895 | H | -4.506598  | 2.85586   | 0.050221  |
| O | -3.509278 | -1.599003 | -0.035756 | H | -10.213791 | 2.350506  | -1.071439 |
| C | -4.382866 | -0.546875 | -0.009392 | H | -8.582657  | 2.058198  | -1.708851 |
| C | -3.887432 | 0.780682  | 0.010875  | H | -9.834078  | 0.811722  | -1.867732 |
| C | -2.498721 | 0.971734  | 0.002679  | H | -9.907557  | 0.567328  | 0.642096  |
| C | -5.728815 | -0.846237 | 0.003187  | H | -8.670878  | 1.789901  | 0.821888  |
| C | -6.688676 | 0.203522  | 0.033688  | H | -9.107935  | -3.112419 | 1.204333  |
| C | -6.196768 | 1.554818  | 0.049765  | H | -7.709376  | -2.208313 | 1.818828  |
| C | -4.852161 | 1.822774  | 0.040027  | H | -9.342933  | -1.539564 | 1.989939  |
| O | -1.491326 | -2.49372  | -0.074086 | H | -9.534363  | -1.360356 | -0.517381 |
| N | -8.023607 | -0.05788  | 0.04706   | H | -7.925151  | -2.017099 | -0.71322  |

Cartesian Coordinates (in Å) of **1-CN<sup>-</sup>**

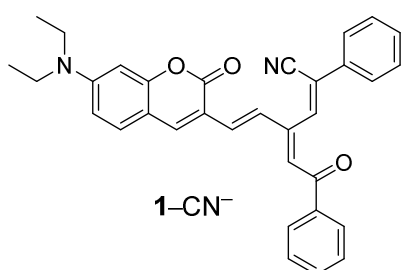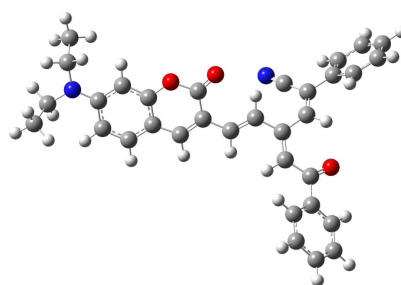

|   |           |           |           |   |           |           |           |
|---|-----------|-----------|-----------|---|-----------|-----------|-----------|
| C | -2.573706 | 0.162579  | 0.202867  | H | -0.324609 | 1.36954   | -0.681665 |
| C | -3.591397 | -0.896052 | 0.208617  | C | 1.293993  | 0.211808  | 0.08181   |
| N | -5.194943 | 1.23074   | -0.58094  | C | 2.217925  | 0.988763  | -0.592975 |
| C | -4.288801 | 1.97735   | -0.178363 | C | 1.782655  | -0.863589 | 0.943847  |
| C | -2.939643 | 1.484825  | 0.116443  | C | 3.610438  | 0.775378  | -0.491658 |
| C | -4.565021 | 3.441685  | -0.001613 | H | 1.859488  | 1.797601  | -1.23227  |
| C | -4.540202 | -3.191285 | -0.108169 | C | 4.602228  | 1.529658  | -1.163992 |
| C | -4.675682 | -4.231222 | -1.045046 | C | 4.064753  | -0.271549 | 0.339435  |
| C | -5.69886  | -5.170842 | -0.921242 | C | 5.941256  | 1.254199  | -1.013808 |
| C | -6.599947 | -5.094334 | 0.143322  | H | 4.290227  | 2.349807  | -1.809688 |
| C | -6.465905 | -4.072751 | 1.088392  | C | 5.403863  | -0.574307 | 0.507716  |
| C | -5.443956 | -3.132814 | 0.968649  | C | 6.392496  | 0.186542  | -0.169208 |
| C | -5.695167 | 3.981131  | -0.640757 | H | 6.655599  | 1.87456   | -1.54142  |
| C | -6.011937 | 5.330149  | -0.504948 | H | 5.654923  | -1.406374 | 1.154162  |
| C | -5.210868 | 6.160533  | 0.286771  | C | -1.176917 | -0.225982 | 0.398348  |
| C | -4.09361  | 5.633126  | 0.939126  | H | -0.992686 | -1.145545 | 0.941157  |
| C | -3.768353 | 4.283711  | 0.793134  | O | 1.114782  | -1.629519 | 1.617835  |
| H | -4.559386 | -0.617757 | 0.608728  | O | 3.15929   | -1.043464 | 1.017405  |
| H | -2.165547 | 2.228826  | 0.265339  | N | 7.724727  | -0.081908 | -0.019031 |
| H | -3.986232 | -4.300718 | -1.88386  | C | 8.756895  | 0.611088  | -0.800358 |
| H | -5.791274 | -5.963842 | -1.661581 | C | 9.260358  | 1.899695  | -0.140259 |
| H | -7.396028 | -5.83054  | 0.241879  | H | 8.378648  | 0.812576  | -1.806967 |
| H | -7.152073 | -4.013873 | 1.931756  | H | 9.589032  | -0.08977  | -0.926124 |
| H | -5.335014 | -2.364116 | 1.730897  | H | 10.045756 | 2.354232  | -0.754881 |
| H | -6.314141 | 3.32553   | -1.24791  | H | 8.452202  | 2.628983  | -0.021563 |
| H | -6.883848 | 5.737094  | -1.014797 | H | 9.680494  | 1.694338  | 0.850637  |
| H | -5.458754 | 7.215378  | 0.396235  | C | 8.210494  | -1.104069 | 0.915074  |
| H | -3.473636 | 6.272327  | 1.565636  | C | 8.28264   | -2.507562 | 0.302566  |
| H | -2.904433 | 3.89099   | 1.32421   | H | 7.582357  | -1.103652 | 1.811243  |
| C | -3.46564  | -2.171895 | -0.249454 | H | 9.206967  | -0.791403 | 1.24479   |
| C | -2.300365 | -2.593633 | -0.978448 | H | 8.675236  | -3.218307 | 1.038703  |
| N | -1.405211 | -3.000149 | -1.602668 | H | 7.294382  | -2.85484  | -0.016213 |
| C | -0.121145 | 0.486747  | -0.072334 | H | 8.945488  | -2.521193 | -0.569842 |

Cartesian Coordinates (in Å) of **3**

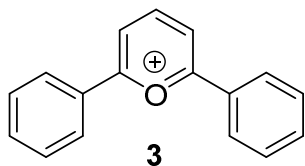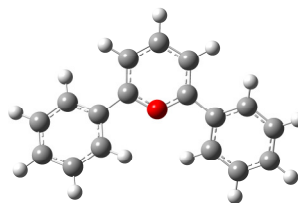

|   |           |           |           |   |           |           |           |
|---|-----------|-----------|-----------|---|-----------|-----------|-----------|
| C | 0.000019  | 3.00211   | 0.00007   | C | 4.691912  | -0.34327  | 0.358302  |
| C | -1.206753 | 2.313224  | 0.004491  | C | 3.593504  | 0.502591  | 0.391072  |
| C | -1.186997 | 0.933626  | 0.004836  | H | -2.150735 | 2.845259  | 0.031318  |
| O | -0.000026 | 0.302088  | 0.000218  | H | 2.150712  | 2.845181  | -0.031133 |
| C | 1.186986  | 0.933539  | -0.004548 | H | -1.249783 | -1.638718 | 0.852714  |
| C | 1.206735  | 2.313136  | -0.004353 | H | -3.206782 | -3.128642 | 0.904346  |
| C | 2.337599  | 0.041851  | -0.034411 | H | -5.4191   | -2.309357 | 0.132155  |
| C | -2.337624 | 0.041954  | 0.034549  | H | -5.657431 | 0.0169    | -0.701526 |
| C | -2.207234 | -1.277098 | 0.497743  | H | -3.711556 | 1.512001  | -0.772933 |
| C | -3.312941 | -2.11295  | 0.534418  | H | 1.249454  | -1.639178 | -0.851589 |
| C | -4.555477 | -1.650406 | 0.104567  | H | 3.206534  | -3.128958 | -0.903677 |
| C | -4.691733 | -0.343398 | -0.359113 | H | 5.419164  | -2.309321 | -0.132779 |
| C | -3.593348 | 0.50251   | -0.391624 | H | 5.657752  | 0.017177  | 0.700157  |
| C | 2.20705   | -1.277374 | -0.497124 | H | 3.71186   | 1.512183  | 0.772037  |
| C | 3.312799  | -2.113157 | -0.534076 | H | 0.000068  | 4.089957  | 0.000068  |
| C | 4.555513  | -1.650418 | -0.10495  |   |           |           |           |

Cartesian Coordinates (in Å) of **3-CN<sup>-</sup>**

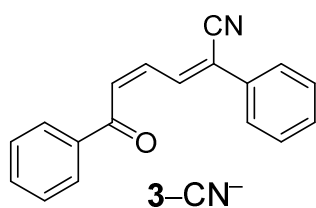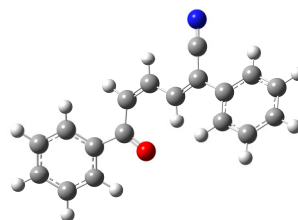

|   |          |          |          |   |          |          |          |
|---|----------|----------|----------|---|----------|----------|----------|
| C | -0.12127 | 1.524439 | -0.09873 | H | 0.680208 | -0.47448 | -0.07473 |
| C | 0.952761 | 0.570076 | -0.049   | H | -2.11371 | 2.108029 | -0.18807 |
| O | -1.41429 | -1.08885 | -0.54764 | H | 4.873237 | 1.274066 | -0.67747 |
| C | -2.07034 | -0.08141 | -0.29195 | H | 6.697868 | -0.36645 | -0.59867 |
| C | -1.44474 | 1.255805 | -0.18515 | H | 6.271429 | -2.67576 | 0.210762 |
| C | -3.55139 | -0.1835  | -0.1035  | H | 3.990283 | -3.3124  | 0.959093 |
| C | 3.37342  | -0.08264 | 0.081475 | H | 2.166912 | -1.67945 | 0.903521 |
| C | 4.670149 | 0.270822 | -0.31813 | H | -3.61068 | -2.10597 | -1.05426 |
| C | 5.703009 | -0.65754 | -0.27693 | H | -6.05691 | -2.39066 | -0.76516 |
| C | 5.463735 | -1.95161 | 0.174082 | H | -7.37822 | -0.63141 | 0.383787 |
| C | 4.182506 | -2.31    | 0.589818 | H | -6.24854 | 1.407801 | 1.229368 |
| C | 3.147938 | -1.38707 | 0.547662 | H | -3.83417 | 1.702482 | 0.922018 |
| C | -4.19781 | -1.33917 | -0.56206 | C | 2.27176  | 0.898602 | 0.005906 |
| C | -5.56552 | -1.49633 | -0.39498 | C | 2.645881 | 2.284111 | -0.03056 |
| C | -6.30801 | -0.50713 | 0.249203 | N | 2.957858 | 3.394419 | -0.05607 |
| C | -5.67566 | 0.639677 | 0.719658 | H | 0.154597 | 2.575445 | -0.0461  |
| C | -4.30691 | 0.805969 | 0.538087 |   |          |          |          |
